# Supplementary material for: Immune Biomarkers in Blood from Sarcoma Patients: A Pilot Study
Source: MDPI journal article supplement (doi:10.3390/curroncol29080441), 2022-08-05
Supplement: s1 [file s1]

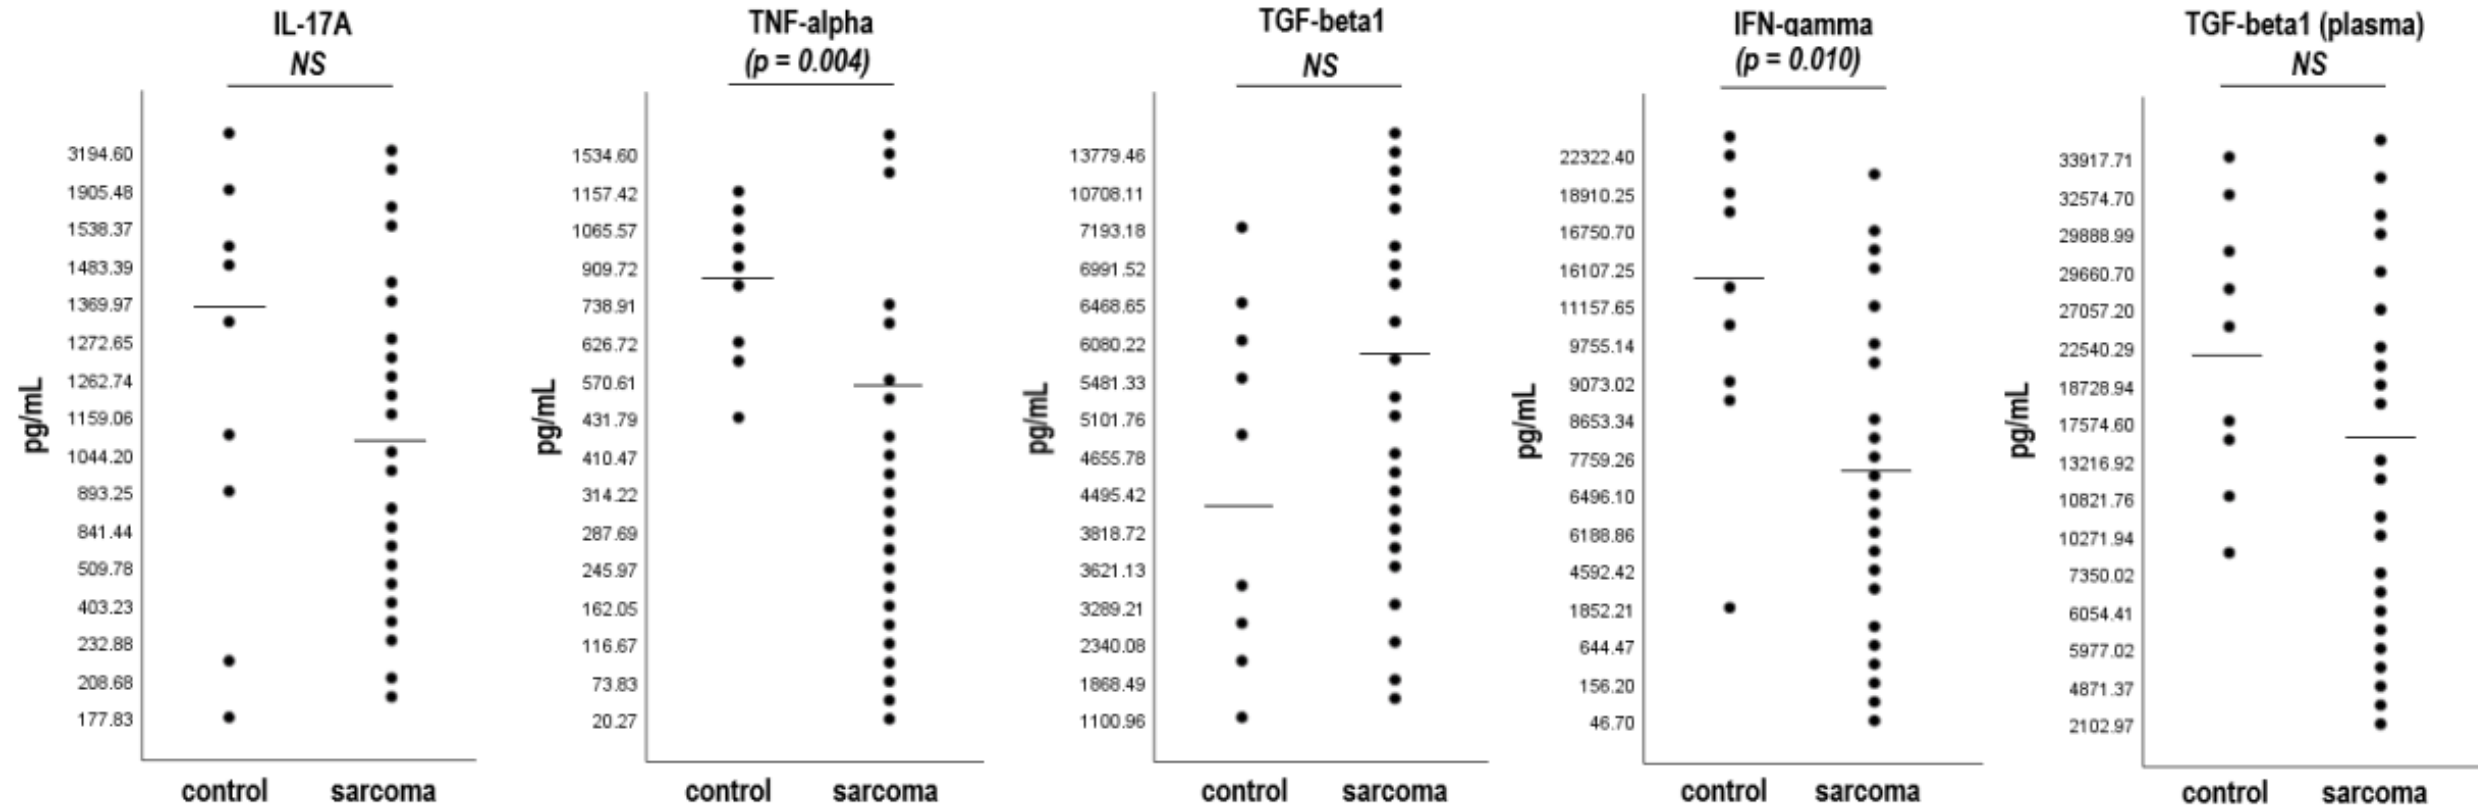

**Figure S4:** Dot plot for individual value of IL-17A, TNF-alpha, TGF-beta1, IFN-gamma and plasma TGF-beta1 cells in sarcoma patients and normal controls.
