# Supplementary material for: Immune Biomarkers in Blood from Sarcoma Patients: A Pilot Study
Source: MDPI journal article supplement (doi:10.3390/curroncol29080441), 2022-08-05
Supplement: s1 [file s1]

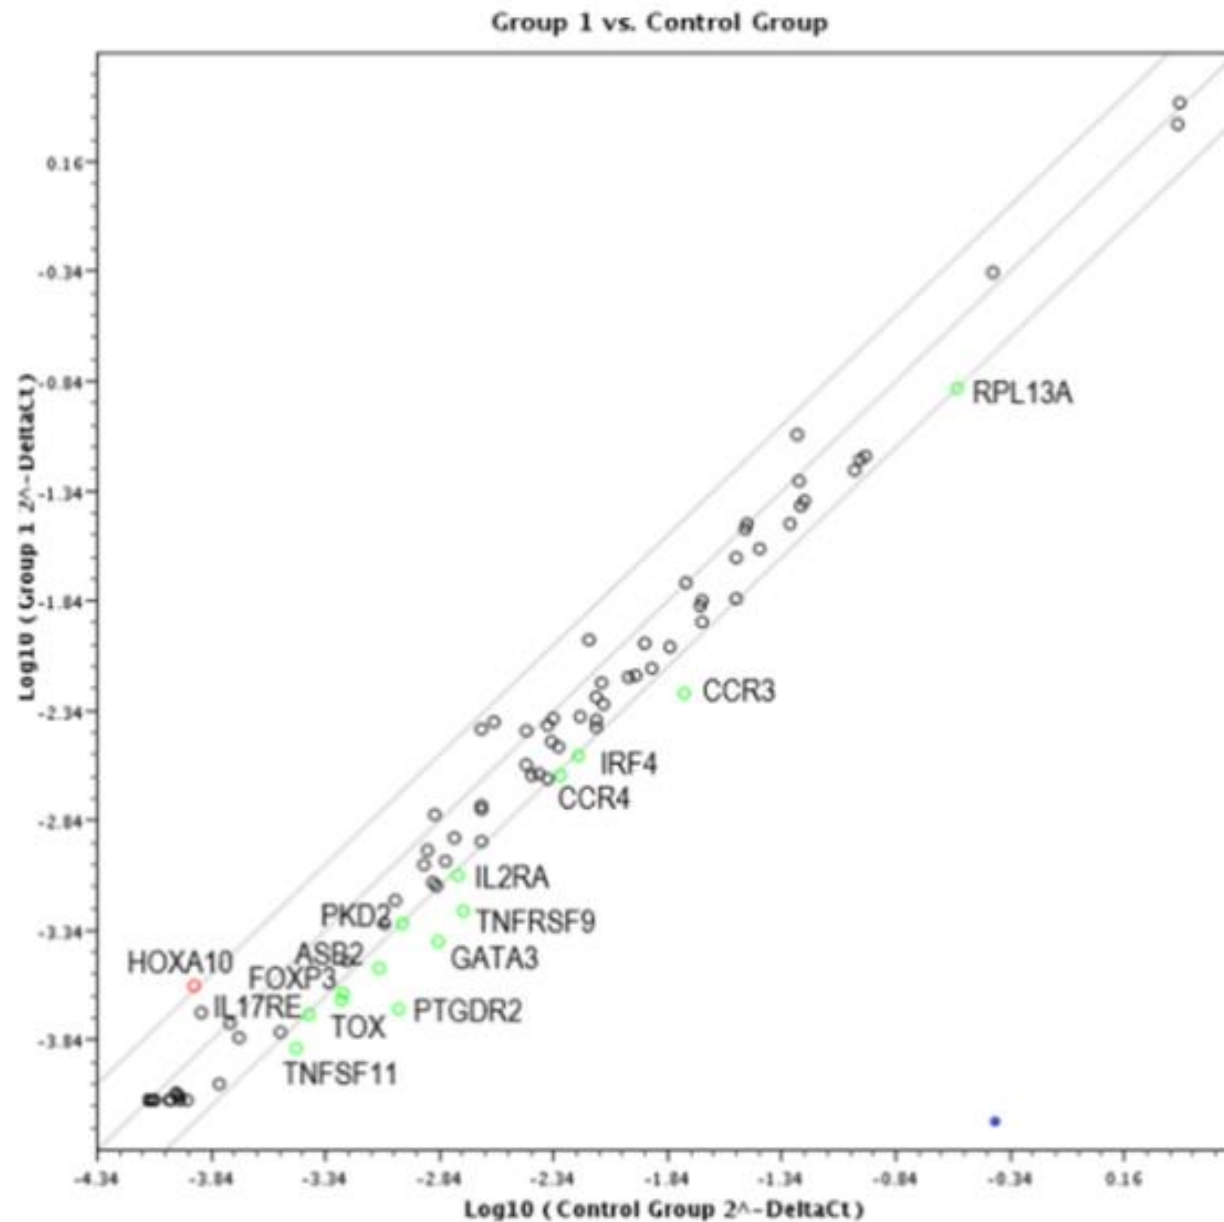

**Figure S5:** The graph of log10 of normalized gene expressions between the standard control and sarcoma patients. The graph show upregulated genes by two folds in red dots, and green dots represent downregulated genes by two-folds.
