# Supplementary material for: Immune Biomarkers in Blood from Sarcoma Patients: A Pilot Study
Source: MDPI journal article supplement (doi:10.3390/curroncol29080441), 2022-08-05
Supplement: s1 [file s1]

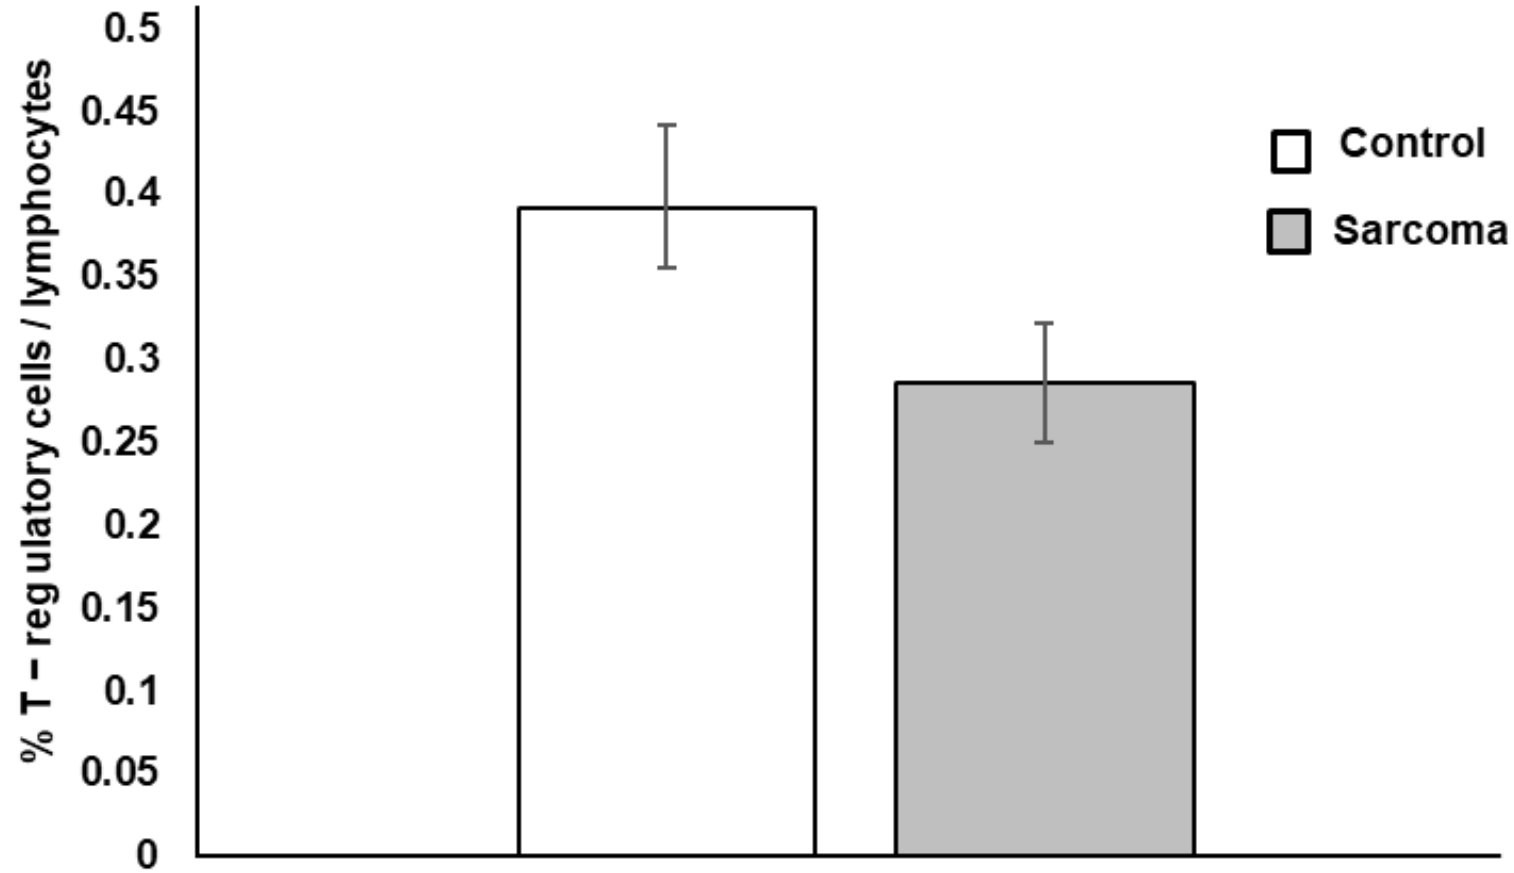

**Figure S3:** Graph of T-reg cells / T-lymphocytes. Treg cells were calculated as a percentage of the T-lymphocyte population in sarcoma patients or normal controls. There was no difference ( $p = 0.080$ ) observed between the mean percentage of Treg cells / T-lymphocytes in sarcoma patients (0.29%) compared to normal controls (0.39%).
