# Supplementary material for: Immune Biomarkers in Blood from Sarcoma Patients: A Pilot Study
Source: MDPI journal article supplement (doi:10.3390/curroncol29080441), 2022-08-05
Supplement: s1 [file s1]

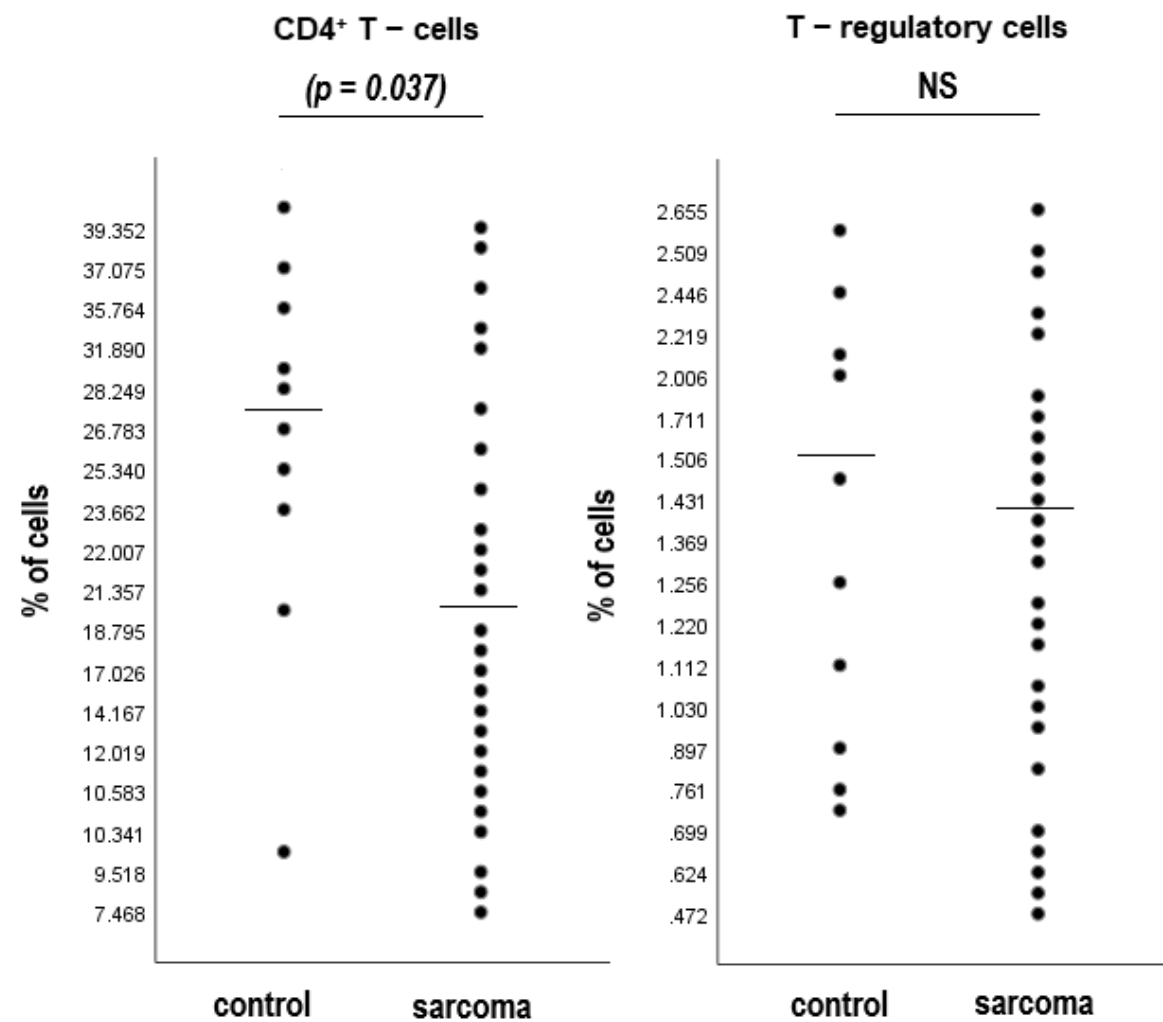

**Figure S2:** Dot plot for individual value of CD4<sup>+</sup> T-cells and T-reg cells in sarcoma patients and normal controls.
