# Supplementary material for: Immune Biomarkers in Blood from Sarcoma Patients: A Pilot Study
Source: MDPI journal article supplement (doi:10.3390/curroncol29080441), 2022-08-05
Supplement: s1 [file s1]

**Table S1:** Sarcoma subtypes used in each analysis .

| Analyses                                 | Sarcoma subtypes ( <i>n</i> ) |   |
|------------------------------------------|-------------------------------|---|
| Flow cytometry analysis ( <i>N</i> = 26) | Osteosarcoma                  | 5 |
|                                          | Chondrosarcoma                | 5 |
|                                          | Pleomorphic sarcoma           | 3 |
|                                          | Liposarcoma                   | 3 |
|                                          | Synovial sarcoma              | 2 |
|                                          | Ewings sarcoma                | 2 |
|                                          | Rhabdomyosarcoma              | 2 |
|                                          | Desmoid tumor                 | 1 |
|                                          | alveolar soft part sarcoma    | 1 |
|                                          | Myofibroblastic sarcoma       | 1 |
|                                          | Malignant GCT                 | 1 |
| Cytokine quantification ( <i>N</i> = 23) | Pleomorphic sarcoma           | 5 |
|                                          | Osteosarcoma                  | 5 |
|                                          | Chondrosarcoma                | 3 |
|                                          | Ewings sarcoma                | 3 |
|                                          | Liposarcoma                   | 1 |
|                                          | desmoid tumor                 | 1 |
|                                          | alveolar soft part sarcoma    | 1 |
|                                          | Rhabdomyosarcoma              | 1 |
|                                          | Leiomyosarcoma                | 1 |
|                                          | myofibroblastic sarcoma       | 1 |
|                                          | Malignant GCT                 | 1 |
| Gene expression ( <i>N</i> = 5)          | Pleomorphic sarcoma           | 3 |
|                                          | Leiomyosarcoma                | 1 |
|                                          | Liposarcoma                   | 1 |

[GCT; giant cell tumour].
